# Supplementary material for: The MASP Family of Trypanosoma cruzi: Changes in Gene Expression and Antigenic Profile during the Acute Phase of Experimental Infection
Source: PLoS Negl Trop Dis. 2012 Aug 14;6(8):e1779. doi: 10.1371/journal.pntd.0001779 (PMC3419193; doi:10.1371/journal.pntd.0001779)
Supplement: Table S4 — List of members of each MASP group. (XLS) [file pntd.0001779.s008.xls]

## Sheet: Table S4
Table S4: List of members of each MASP group
Locus_id	MASP group	Pseudogene
Tc00.1047053412419.10	black	Yes
Tc00.1047053424499.10	black	No
Tc00.1047053432443.10	black	No
Tc00.1047053503645.40	black	No
Tc00.1047053503827.20	black	No
Tc00.1047053503947.20	black	No
Tc00.1047053503973.150	black	No
Tc00.1047053504039.160	black	No
Tc00.1047053504039.57	black	Yes
Tc00.1047053504155.43	black	Yes
Tc00.1047053504261.100	black	Yes
Tc00.1047053504493.10	black	No
Tc00.1047053506067.140	black	No
Tc00.1047053506067.169	black	No
Tc00.1047053506131.110	black	No
Tc00.1047053506131.84	black	No
Tc00.1047053506133.140	black	No
Tc00.1047053506133.80	black	Yes
Tc00.1047053506187.50	black	No
Tc00.1047053506245.270	black	No
Tc00.1047053506267.90	black	No
Tc00.1047053506321.140	black	No
Tc00.1047053506321.20	black	No
Tc00.1047053506501.329	black	Yes
Tc00.1047053506501.380	black	No
Tc00.1047053506599.100	black	No
Tc00.1047053506599.210	black	No
Tc00.1047053506703.110	black	No
Tc00.1047053506703.74	black	Yes
Tc00.1047053506759.20	black	No
Tc00.1047053506759.80	black	No
Tc00.1047053506763.30	black	No
Tc00.1047053506769.120	black	No
Tc00.1047053506877.60	black	No
Tc00.1047053506955.14	black	Yes
Tc00.1047053506955.184	black	Yes
Tc00.1047053506955.212	black	No
Tc00.1047053506955.244	black	No
Tc00.1047053506955.70	black	No
Tc00.1047053506955.99	black	No
Tc00.1047053507069.10	black	No
Tc00.1047053507069.150	black	No
Tc00.1047053507069.180	black	No
Tc00.1047053507069.220	black	No
Tc00.1047053507071.120	black	No
Tc00.1047053507071.140	black	No
Tc00.1047053507523.80	black	No
Tc00.1047053507833.10	black	No
Tc00.1047053507937.50	black	No
Tc00.1047053507957.320	black	No
Tc00.1047053508013.110	black	No
Tc00.1047053508121.56	black	Yes
Tc00.1047053508221.170	black	No
Tc00.1047053508221.490	black	No
Tc00.1047053508221.960	black	No
Tc00.1047053508305.50	black	No
Tc00.1047053508309.10	black	No
Tc00.1047053508427.20	black	No
Tc00.1047053508427.40	black	No
Tc00.1047053508433.30	black	No
Tc00.1047053508433.90	black	No
Tc00.1047053508539.110	black	No
Tc00.1047053508539.160	black	No
Tc00.1047053508539.60	black	No
Tc00.1047053508541.110	black	No
Tc00.1047053508541.20	black	No
Tc00.1047053508759.60	black	No
Tc00.1047053509419.100	black	Yes
Tc00.1047053509419.80	black	No
Tc00.1047053509699.60	black	Yes
Tc00.1047053509753.194	black	No
Tc00.1047053509811.18	black	Yes
Tc00.1047053510011.9	black	No
Tc00.1047053510017.59	black	No
Tc00.1047053510205.50	black	No
Tc00.1047053510363.320	black	No
Tc00.1047053510369.10	black	No
Tc00.1047053510371.120	black	No
Tc00.1047053510371.70	black	No
Tc00.1047053510377.390	black	No
Tc00.1047053510465.24	black	Yes
Tc00.1047053510477.100	black	No
Tc00.1047053510489.20	black	No
Tc00.1047053510583.130	black	No
Tc00.1047053510623.39	black	Yes
Tc00.1047053510693.130	black	No
Tc00.1047053510697.130	black	No
Tc00.1047053510697.40	black	No
Tc00.1047053510699.80	black	No
Tc00.1047053510701.10	black	No
Tc00.1047053510713.110	black	No
Tc00.1047053510713.130	black	No
Tc00.1047053510715.40	black	No
Tc00.1047053510833.20	black	No
Tc00.1047053510917.9	black	No
Tc00.1047053511077.60	black	No
Tc00.1047053511081.60	black	No
Tc00.1047053511089.130	black	No
Tc00.1047053511089.140	black	No
Tc00.1047053511089.19	black	No
Tc00.1047053511089.30	black	No
Tc00.1047053511171.90	black	No
Tc00.1047053511173.270	black	No
Tc00.1047053511173.360	black	No
Tc00.1047053511173.400	black	No
Tc00.1047053511173.64	black	No
Tc00.1047053511255.330	black	No
Tc00.1047053397923.10	blue	No
Tc00.1047053410275.9	blue	No
Tc00.1047053421621.50	blue	No
Tc00.1047053429251.10	blue	No
Tc00.1047053444331.10	blue	No
Tc00.1047053445783.10	blue	Yes
Tc00.1047053448197.10	blue	No
Tc00.1047053453767.50	blue	No
Tc00.1047053503427.19	blue	Yes
Tc00.1047053503497.10	blue	Yes
Tc00.1047053503501.70	blue	No
Tc00.1047053503585.115	blue	No
Tc00.1047053503699.11	blue	Yes
Tc00.1047053503771.10	blue	No
Tc00.1047053503827.5	blue	No
Tc00.1047053503875.10	blue	No
Tc00.1047053504031.60	blue	Yes
Tc00.1047053504155.10	blue	No
Tc00.1047053504155.293	blue	No
Tc00.1047053504249.111	blue	No
Tc00.1047053505025.10	blue	No
Tc00.1047053505479.10	blue	Yes
Tc00.1047053505567.31	blue	Yes
Tc00.1047053506023.10	blue	Yes
Tc00.1047053506027.10	blue	Yes
Tc00.1047053506057.81	blue	Yes
Tc00.1047053506067.260	blue	No
Tc00.1047053506133.207	blue	Yes
Tc00.1047053506137.60	blue	No
Tc00.1047053506185.20	blue	No
Tc00.1047053506245.264	blue	No
Tc00.1047053506245.302	blue	No
Tc00.1047053506245.41	blue	No
Tc00.1047053506267.10	blue	No
Tc00.1047053506281.134	blue	No
Tc00.1047053506307.10	blue	No
Tc00.1047053506643.10	blue	No
Tc00.1047053506741.30	blue	Yes
Tc00.1047053506787.19	blue	Yes
Tc00.1047053506789.11	blue	No
Tc00.1047053506805.10	blue	No
Tc00.1047053506939.10	blue	Yes
Tc00.1047053506971.10	blue	No
Tc00.1047053506973.5	blue	No
Tc00.1047053507205.10	blue	Yes
Tc00.1047053507429.3	blue	No
Tc00.1047053507471.20	blue	Yes
Tc00.1047053507553.41	blue	No
Tc00.1047053507731.10	blue	No
Tc00.1047053507957.334	blue	No
Tc00.1047053508057.20	blue	Yes
Tc00.1047053508071.60	blue	No
Tc00.1047053508081.10	blue	No
Tc00.1047053508151.5	blue	Yes
Tc00.1047053508219.10	blue	Yes
Tc00.1047053508221.381	blue	Yes
Tc00.1047053508293.44	blue	Yes
Tc00.1047053508341.10	blue	No
Tc00.1047053508435.10	blue	No
Tc00.1047053508495.9	blue	Yes
Tc00.1047053508521.70	blue	Yes
Tc00.1047053508615.10	blue	No
Tc00.1047053508747.5	blue	No
Tc00.1047053508853.10	blue	No
Tc00.1047053508869.20	blue	No
Tc00.1047053508873.344	blue	Yes
Tc00.1047053508885.5	blue	No
Tc00.1047053508983.10	blue	Yes
Tc00.1047053509075.40	blue	No
Tc00.1047053509081.5	blue	No
Tc00.1047053509093.10	blue	No
Tc00.1047053509259.30	blue	Yes
Tc00.1047053509291.20	blue	No
Tc00.1047053509325.10	blue	No
Tc00.1047053509369.81	blue	Yes
Tc00.1047053509477.10	blue	No
Tc00.1047053509525.10	blue	Yes
Tc00.1047053509527.154	blue	Yes
Tc00.1047053509653.10	blue	No
Tc00.1047053509697.15	blue	Yes
Tc00.1047053509897.279	blue	No
Tc00.1047053509969.31	blue	Yes
Tc00.1047053510061.11	blue	No
Tc00.1047053510201.5	blue	No
Tc00.1047053510205.80	blue	No
Tc00.1047053510207.21	blue	Yes
Tc00.1047053510219.5	blue	No
Tc00.1047053510275.29	blue	No
Tc00.1047053510279.349	blue	No
Tc00.1047053510363.80	blue	No
Tc00.1047053510373.119	blue	No
Tc00.1047053510375.40	blue	No
Tc00.1047053510419.11	blue	Yes
Tc00.1047053510457.10	blue	No
Tc00.1047053510489.5	blue	No
Tc00.1047053510539.10	blue	No
Tc00.1047053510561.7	blue	No
Tc00.1047053510585.10	blue	Yes
Tc00.1047053510587.20	blue	Yes
Tc00.1047053510693.150	blue	No
Tc00.1047053510693.91	blue	No
Tc00.1047053510697.10	blue	No
Tc00.1047053510709.10	blue	No
Tc00.1047053510713.170	blue	No
Tc00.1047053510831.10	blue	Yes
Tc00.1047053511057.60	blue	No
Tc00.1047053511061.51	blue	No
Tc00.1047053511063.130	blue	No
Tc00.1047053511089.90	blue	No
Tc00.1047053511175.10	blue	No
Tc00.1047053511213.15	blue	No
Tc00.1047053511449.10	blue	No
Tc00.1047053511449.119	blue	Yes
Tc00.1047053511603.500	blue	No
Tc00.1047053511785.10	blue	No
Tc00.1047053511791.10	blue	No
Tc00.1047053511793.30	blue	No
Tc00.1047053511863.10	blue	No
Tc00.1047053511871.120	blue	No
Tc00.1047053511919.10	blue	No
Tc00.1047053408547.10	darkgreen	No
Tc00.1047053421555.9	darkgreen	No
Tc00.1047053503429.30	darkgreen	No
Tc00.1047053503507.35	darkgreen	Yes
Tc00.1047053503519.30	darkgreen	No
Tc00.1047053503609.24	darkgreen	Yes
Tc00.1047053503741.20	darkgreen	Yes
Tc00.1047053503783.34	darkgreen	Yes
Tc00.1047053503783.80	darkgreen	No
Tc00.1047053503827.60	darkgreen	No
Tc00.1047053503875.30	darkgreen	No
Tc00.1047053503973.120	darkgreen	No
Tc00.1047053503973.190	darkgreen	No
Tc00.1047053503973.280	darkgreen	No
Tc00.1047053503977.70	darkgreen	Yes
Tc00.1047053504039.130	darkgreen	No
Tc00.1047053504039.200	darkgreen	No
Tc00.1047053504039.90	darkgreen	Yes
Tc00.1047053504081.400	darkgreen	No
Tc00.1047053504081.50	darkgreen	No
Tc00.1047053504081.530	darkgreen	No
Tc00.1047053504081.90	darkgreen	No
Tc00.1047053504155.230	darkgreen	No
Tc00.1047053504201.50	darkgreen	No
Tc00.1047053504239.140	darkgreen	Yes
Tc00.1047053504239.195	darkgreen	Yes
Tc00.1047053504587.30	darkgreen	No
Tc00.1047053504655.9	darkgreen	No
Tc00.1047053504669.40	darkgreen	Yes
Tc00.1047053504777.50	darkgreen	Yes
Tc00.1047053504787.54	darkgreen	Yes
Tc00.1047053504911.20	darkgreen	Yes
Tc00.1047053505023.40	darkgreen	No
Tc00.1047053505025.70	darkgreen	No
Tc00.1047053505297.60	darkgreen	No
Tc00.1047053505949.20	darkgreen	No
Tc00.1047053505949.50	darkgreen	Yes
Tc00.1047053505949.80	darkgreen	No
Tc00.1047053506001.14	darkgreen	No
Tc00.1047053506001.50	darkgreen	No
Tc00.1047053506015.30	darkgreen	Yes
Tc00.1047053506101.10	darkgreen	No
Tc00.1047053506131.140	darkgreen	No
Tc00.1047053506139.40	darkgreen	No
Tc00.1047053506173.100	darkgreen	Yes
Tc00.1047053506173.60	darkgreen	No
Tc00.1047053506245.70	darkgreen	Yes
Tc00.1047053506267.70	darkgreen	No
Tc00.1047053506269.50	darkgreen	Yes
Tc00.1047053506277.10	darkgreen	No
Tc00.1047053506279.220	darkgreen	Yes
Tc00.1047053506281.100	darkgreen	Yes
Tc00.1047053506309.40	darkgreen	No
Tc00.1047053506329.59	darkgreen	Yes
Tc00.1047053506335.150	darkgreen	Yes
Tc00.1047053506335.69	darkgreen	Yes
Tc00.1047053506409.90	darkgreen	No
Tc00.1047053506459.299	darkgreen	Yes
Tc00.1047053506499.160	darkgreen	No
Tc00.1047053506499.40	darkgreen	No
Tc00.1047053506501.160	darkgreen	Yes
Tc00.1047053506501.220	darkgreen	No
Tc00.1047053506589.89	darkgreen	Yes
Tc00.1047053506599.170	darkgreen	No
Tc00.1047053506599.280	darkgreen	Yes
Tc00.1047053506599.30	darkgreen	Yes
Tc00.1047053506599.360	darkgreen	Yes
Tc00.1047053506599.390	darkgreen	No
Tc00.1047053506599.80	darkgreen	No
Tc00.1047053506601.40	darkgreen	No
Tc00.1047053506603.20	darkgreen	Yes
Tc00.1047053506609.70	darkgreen	No
Tc00.1047053506615.100	darkgreen	No
Tc00.1047053506703.50	darkgreen	No
Tc00.1047053506717.100	darkgreen	Yes
Tc00.1047053506759.170	darkgreen	No
Tc00.1047053506763.130	darkgreen	No
Tc00.1047053506783.39	darkgreen	No
Tc00.1047053506789.50	darkgreen	No
Tc00.1047053506815.20	darkgreen	Yes
Tc00.1047053506879.60	darkgreen	No
Tc00.1047053506899.30	darkgreen	Yes
Tc00.1047053506909.140	darkgreen	Yes
Tc00.1047053506909.155	darkgreen	Yes
Tc00.1047053506911.20	darkgreen	No
Tc00.1047053506939.50	darkgreen	No
Tc00.1047053506965.140	darkgreen	No
Tc00.1047053506967.100	darkgreen	No
Tc00.1047053506969.10	darkgreen	Yes
Tc00.1047053506973.105	darkgreen	Yes
Tc00.1047053506973.20	darkgreen	No
Tc00.1047053506973.30	darkgreen	No
Tc00.1047053506973.90	darkgreen	Yes
Tc00.1047053506993.130	darkgreen	Yes
Tc00.1047053506993.31	darkgreen	Yes
Tc00.1047053507067.30	darkgreen	Yes
Tc00.1047053507067.60	darkgreen	No
Tc00.1047053507069.130	darkgreen	Yes
Tc00.1047053507071.180	darkgreen	No
Tc00.1047053507091.120	darkgreen	No
Tc00.1047053507091.80	darkgreen	No
Tc00.1047053507145.84	darkgreen	Yes
Tc00.1047053507217.30	darkgreen	Yes
Tc00.1047053507217.60	darkgreen	Yes
Tc00.1047053507231.30	darkgreen	No
Tc00.1047053507237.120	darkgreen	No
Tc00.1047053507237.220	darkgreen	No
Tc00.1047053507237.340	darkgreen	No
Tc00.1047053507295.50	darkgreen	No
Tc00.1047053507437.10	darkgreen	No
Tc00.1047053507633.110	darkgreen	Yes
Tc00.1047053507637.45	darkgreen	Yes
Tc00.1047053507699.110	darkgreen	Yes
Tc00.1047053507699.130	darkgreen	No
Tc00.1047053507699.180	darkgreen	Yes
Tc00.1047053507747.114	darkgreen	Yes
Tc00.1047053507803.10	darkgreen	No
Tc00.1047053507847.20	darkgreen	Yes
Tc00.1047053507957.150	darkgreen	No
Tc00.1047053507959.110	darkgreen	No
Tc00.1047053507959.170	darkgreen	No
Tc00.1047053507959.210	darkgreen	No
Tc00.1047053507959.350	darkgreen	No
Tc00.1047053507959.80	darkgreen	No
Tc00.1047053507961.10	darkgreen	Yes
Tc00.1047053508013.10	darkgreen	Yes
Tc00.1047053508033.39	darkgreen	Yes
Tc00.1047053508097.60	darkgreen	No
Tc00.1047053508117.20	darkgreen	Yes
Tc00.1047053508119.20	darkgreen	No
Tc00.1047053508121.110	darkgreen	No
Tc00.1047053508121.130	darkgreen	Yes
Tc00.1047053508125.50	darkgreen	Yes
Tc00.1047053508143.80	darkgreen	No
Tc00.1047053508147.150	darkgreen	No
Tc00.1047053508163.120	darkgreen	Yes
Tc00.1047053508163.230	darkgreen	No
Tc00.1047053508163.270	darkgreen	No
Tc00.1047053508165.210	darkgreen	No
Tc00.1047053508165.280	darkgreen	No
Tc00.1047053508165.30	darkgreen	No
Tc00.1047053508219.110	darkgreen	No
Tc00.1047053508221.1010	darkgreen	No
Tc00.1047053508221.150	darkgreen	No
Tc00.1047053508221.30	darkgreen	No
Tc00.1047053508221.550	darkgreen	No
Tc00.1047053508221.580	darkgreen	No
Tc00.1047053508221.600	darkgreen	No
Tc00.1047053508243.10	darkgreen	No
Tc00.1047053508247.130	darkgreen	No
Tc00.1047053508247.50	darkgreen	Yes
Tc00.1047053508247.80	darkgreen	No
Tc00.1047053508251.31	darkgreen	Yes
Tc00.1047053508295.40	darkgreen	No
Tc00.1047053508313.30	darkgreen	No
Tc00.1047053508359.20	darkgreen	Yes
Tc00.1047053508365.114	darkgreen	Yes
Tc00.1047053508365.200	darkgreen	No
Tc00.1047053508365.284	darkgreen	Yes
Tc00.1047053508365.40	darkgreen	No
Tc00.1047053508375.10	darkgreen	No
Tc00.1047053508389.100	darkgreen	No
Tc00.1047053508495.150	darkgreen	Yes
Tc00.1047053508511.10	darkgreen	Yes
Tc00.1047053508511.40	darkgreen	Yes
Tc00.1047053508735.30	darkgreen	No
Tc00.1047053508753.10	darkgreen	Yes
Tc00.1047053508759.40	darkgreen	No
Tc00.1047053508761.150	darkgreen	Yes
Tc00.1047053508761.240	darkgreen	Yes
Tc00.1047053508761.270	darkgreen	No
Tc00.1047053508761.30	darkgreen	No
Tc00.1047053508761.9	darkgreen	Yes
Tc00.1047053508761.90	darkgreen	No
Tc00.1047053508789.150	darkgreen	No
Tc00.1047053508789.204	darkgreen	Yes
Tc00.1047053508873.160	darkgreen	No
Tc00.1047053508873.210	darkgreen	No
Tc00.1047053508873.250	darkgreen	No
Tc00.1047053508873.30	darkgreen	No
Tc00.1047053508873.580	darkgreen	No
Tc00.1047053508873.70	darkgreen	Yes
Tc00.1047053508883.39	darkgreen	Yes
Tc00.1047053508887.24	darkgreen	Yes
Tc00.1047053508977.130	darkgreen	No
Tc00.1047053508977.20	darkgreen	No
Tc00.1047053508977.50	darkgreen	No
Tc00.1047053508977.99	darkgreen	Yes
Tc00.1047053508979.60	darkgreen	No
Tc00.1047053508999.150	darkgreen	No
Tc00.1047053508999.80	darkgreen	No
Tc00.1047053509081.110	darkgreen	No
Tc00.1047053509081.150	darkgreen	No
Tc00.1047053509081.20	darkgreen	No
Tc00.1047053509113.10	darkgreen	Yes
Tc00.1047053509115.30	darkgreen	No
Tc00.1047053509195.30	darkgreen	No
Tc00.1047053509217.90	darkgreen	No
Tc00.1047053509251.9	darkgreen	Yes
Tc00.1047053509287.110	darkgreen	No
Tc00.1047053509419.20	darkgreen	No
Tc00.1047053509419.49	darkgreen	Yes
Tc00.1047053509525.160	darkgreen	Yes
Tc00.1047053509525.230	darkgreen	No
Tc00.1047053509525.390	darkgreen	No
Tc00.1047053509525.410	darkgreen	Yes
Tc00.1047053509525.94	darkgreen	Yes
Tc00.1047053509527.80	darkgreen	No
Tc00.1047053509545.10	darkgreen	No
Tc00.1047053509547.40	darkgreen	No
Tc00.1047053509631.80	darkgreen	No
Tc00.1047053509665.20	darkgreen	No
Tc00.1047053509753.100	darkgreen	No
Tc00.1047053509753.60	darkgreen	No
Tc00.1047053509753.70	darkgreen	No
Tc00.1047053509897.124	darkgreen	Yes
Tc00.1047053509897.170	darkgreen	Yes
Tc00.1047053509897.30	darkgreen	Yes
Tc00.1047053509897.80	darkgreen	Yes
Tc00.1047053509899.50	darkgreen	Yes
Tc00.1047053509905.180	darkgreen	No
Tc00.1047053509973.10	darkgreen	No
Tc00.1047053509977.80	darkgreen	No
Tc00.1047053509993.15	darkgreen	Yes
Tc00.1047053509993.31	darkgreen	Yes
Tc00.1047053509993.51	darkgreen	Yes
Tc00.1047053510013.260	darkgreen	No
Tc00.1047053510013.40	darkgreen	No
Tc00.1047053510021.109	darkgreen	Yes
Tc00.1047053510021.130	darkgreen	No
Tc00.1047053510025.180	darkgreen	No
Tc00.1047053510025.30	darkgreen	Yes
Tc00.1047053510037.10	darkgreen	No
Tc00.1047053510039.30	darkgreen	No
Tc00.1047053510085.60	darkgreen	No
Tc00.1047053510157.10	darkgreen	No
Tc00.1047053510163.30	darkgreen	No
Tc00.1047053510191.10	darkgreen	No
Tc00.1047053510193.10	darkgreen	No
Tc00.1047053510197.190	darkgreen	No
Tc00.1047053510197.20	darkgreen	No
Tc00.1047053510199.30	darkgreen	No
Tc00.1047053510203.34	darkgreen	Yes
Tc00.1047053510205.20	darkgreen	No
Tc00.1047053510207.40	darkgreen	No
Tc00.1047053510237.120	darkgreen	No
Tc00.1047053510237.40	darkgreen	Yes
Tc00.1047053510239.40	darkgreen	Yes
Tc00.1047053510261.10	darkgreen	No
Tc00.1047053510279.90	darkgreen	Yes
Tc00.1047053510359.420	darkgreen	Yes
Tc00.1047053510359.480	darkgreen	Yes
Tc00.1047053510359.680	darkgreen	Yes
Tc00.1047053510361.190	darkgreen	No
Tc00.1047053510361.209	darkgreen	Yes
Tc00.1047053510361.30	darkgreen	No
Tc00.1047053510361.50	darkgreen	Yes
Tc00.1047053510363.160	darkgreen	Yes
Tc00.1047053510363.260	darkgreen	No
Tc00.1047053510363.70	darkgreen	No
Tc00.1047053510371.10	darkgreen	No
Tc00.1047053510371.100	darkgreen	No
Tc00.1047053510377.220	darkgreen	Yes
Tc00.1047053510391.20	darkgreen	No
Tc00.1047053510417.20	darkgreen	Yes
Tc00.1047053510459.20	darkgreen	No
Tc00.1047053510463.150	darkgreen	No
Tc00.1047053510463.240	darkgreen	No
Tc00.1047053510465.110	darkgreen	Yes
Tc00.1047053510465.140	darkgreen	No
Tc00.1047053510465.74	darkgreen	No
Tc00.1047053510475.100	darkgreen	No
Tc00.1047053510477.80	darkgreen	No
Tc00.1047053510483.180	darkgreen	No
Tc00.1047053510503.89	darkgreen	Yes
Tc00.1047053510545.30	darkgreen	Yes
Tc00.1047053510557.60	darkgreen	No
Tc00.1047053510559.20	darkgreen	Yes
Tc00.1047053510561.30	darkgreen	No
Tc00.1047053510583.114	darkgreen	Yes
Tc00.1047053510583.180	darkgreen	Yes
Tc00.1047053510583.209	darkgreen	Yes
Tc00.1047053510583.34	darkgreen	Yes
Tc00.1047053510583.74	darkgreen	Yes
Tc00.1047053510621.20	darkgreen	No
Tc00.1047053510623.20	darkgreen	No
Tc00.1047053510625.150	darkgreen	No
Tc00.1047053510625.190	darkgreen	No
Tc00.1047053510625.88	darkgreen	No
Tc00.1047053510627.110	darkgreen	No
Tc00.1047053510693.19	darkgreen	Yes
Tc00.1047053510693.320	darkgreen	No
Tc00.1047053510697.80	darkgreen	No
Tc00.1047053510715.100	darkgreen	Yes
Tc00.1047053510715.140	darkgreen	Yes
Tc00.1047053510803.15	darkgreen	Yes
Tc00.1047053510805.30	darkgreen	Yes
Tc00.1047053510807.50	darkgreen	No
Tc00.1047053510933.110	darkgreen	Yes
Tc00.1047053510959.30	darkgreen	No
Tc00.1047053510961.10	darkgreen	No
Tc00.1047053510961.30	darkgreen	No
Tc00.1047053510979.10	darkgreen	No
Tc00.1047053510979.50	darkgreen	No
Tc00.1047053511079.25	darkgreen	Yes
Tc00.1047053511081.41	darkgreen	Yes
Tc00.1047053511089.70	darkgreen	Yes
Tc00.1047053511099.220	darkgreen	No
Tc00.1047053511099.30	darkgreen	Yes
Tc00.1047053511149.140	darkgreen	Yes
Tc00.1047053511149.20	darkgreen	Yes
Tc00.1047053511149.4	darkgreen	Yes
Tc00.1047053511149.60	darkgreen	No
Tc00.1047053511171.50	darkgreen	Yes
Tc00.1047053511173.120	darkgreen	Yes
Tc00.1047053511173.150	darkgreen	No
Tc00.1047053511173.210	darkgreen	No
Tc00.1047053511173.250	darkgreen	Yes
Tc00.1047053511173.430	darkgreen	No
Tc00.1047053511173.460	darkgreen	No
Tc00.1047053511173.50	darkgreen	No
Tc00.1047053511183.40	darkgreen	Yes
Tc00.1047053511183.600	darkgreen	Yes
Tc00.1047053511185.100	darkgreen	No
Tc00.1047053511185.120	darkgreen	No
Tc00.1047053511197.60	darkgreen	No
Tc00.1047053511213.60	darkgreen	No
Tc00.1047053511255.130	darkgreen	No
Tc00.1047053511255.169	darkgreen	No
Tc00.1047053511255.200	darkgreen	No
Tc00.1047053511255.230	darkgreen	Yes
Tc00.1047053511255.420	darkgreen	Yes
Tc00.1047053511255.540	darkgreen	No
Tc00.1047053511255.630	darkgreen	No
Tc00.1047053511255.670	darkgreen	No
Tc00.1047053511255.80	darkgreen	No
Tc00.1047053511259.149	darkgreen	Yes
Tc00.1047053511259.18	darkgreen	Yes
Tc00.1047053511259.200	darkgreen	Yes
Tc00.1047053511259.220	darkgreen	No
Tc00.1047053511373.10	darkgreen	Yes
Tc00.1047053511377.30	darkgreen	No
Tc00.1047053511397.10	darkgreen	Yes
Tc00.1047053511399.50	darkgreen	No
Tc00.1047053511401.100	darkgreen	No
Tc00.1047053511401.130	darkgreen	Yes
Tc00.1047053511401.40	darkgreen	Yes
Tc00.1047053511449.30	darkgreen	No
Tc00.1047053511553.100	darkgreen	No
Tc00.1047053511553.150	darkgreen	No
Tc00.1047053511553.30	darkgreen	No
Tc00.1047053511555.10	darkgreen	No
Tc00.1047053511591.10	darkgreen	No
Tc00.1047053511599.90	darkgreen	No
Tc00.1047053511603.250	darkgreen	No
Tc00.1047053511603.300	darkgreen	No
Tc00.1047053511603.380	darkgreen	No
Tc00.1047053511605.20	darkgreen	No
Tc00.1047053511605.80	darkgreen	No
Tc00.1047053511607.90	darkgreen	Yes
Tc00.1047053511613.10	darkgreen	No
Tc00.1047053511613.110	darkgreen	No
Tc00.1047053511613.180	darkgreen	No
Tc00.1047053511613.80	darkgreen	No
Tc00.1047053511613.90	darkgreen	No
Tc00.1047053511643.50	darkgreen	Yes
Tc00.1047053511643.73	darkgreen	Yes
Tc00.1047053511667.50	darkgreen	No
Tc00.1047053511797.120	darkgreen	No
Tc00.1047053511851.44	darkgreen	Yes
Tc00.1047053511875.80	darkgreen	No
Tc00.1047053511877.20	darkgreen	No
Tc00.1047053511921.140	darkgreen	No
Tc00.1047053511921.29	darkgreen	Yes
Tc00.1047053511921.90	darkgreen	Yes
Tc00.1047053511923.10	darkgreen	Yes
Tc00.1047053511923.49	darkgreen	Yes
Tc00.1047053511923.80	darkgreen	Yes
Tc00.1047053457979.10	magenta	No
Tc00.1047053463955.20	magenta	No
Tc00.1047053503491.19	magenta	No
Tc00.1047053503587.10	magenta	No
Tc00.1047053503699.19	magenta	No
Tc00.1047053503717.20	magenta	No
Tc00.1047053503717.40	magenta	Yes
Tc00.1047053503717.80	magenta	Yes
Tc00.1047053503771.90	magenta	No
Tc00.1047053503859.40	magenta	No
Tc00.1047053504039.170	magenta	Yes
Tc00.1047053504081.280	magenta	Yes
Tc00.1047053504081.460	magenta	No
Tc00.1047053504155.80	magenta	No
Tc00.1047053504201.40	magenta	No
Tc00.1047053504239.240	magenta	Yes
Tc00.1047053504239.30	magenta	No
Tc00.1047053504249.30	magenta	No
Tc00.1047053504787.70	magenta	No
Tc00.1047053504787.90	magenta	Yes
Tc00.1047053505025.90	magenta	No
Tc00.1047053505949.139	magenta	Yes
Tc00.1047053506067.110	magenta	Yes
Tc00.1047053506067.198	magenta	Yes
Tc00.1047053506131.30	magenta	No
Tc00.1047053506133.170	magenta	Yes
Tc00.1047053506139.10	magenta	No
Tc00.1047053506245.230	magenta	Yes
Tc00.1047053506267.80	magenta	No
Tc00.1047053506289.120	magenta	No
Tc00.1047053506289.150	magenta	No
Tc00.1047053506289.180	magenta	Yes
Tc00.1047053506289.230	magenta	Yes
Tc00.1047053506291.10	magenta	No
Tc00.1047053506309.30	magenta	No
Tc00.1047053506321.120	magenta	No
Tc00.1047053506321.200	magenta	No
Tc00.1047053506335.50	magenta	No
Tc00.1047053506339.40	magenta	No
Tc00.1047053506423.10	magenta	No
Tc00.1047053506499.140	magenta	No
Tc00.1047053506499.210	magenta	No
Tc00.1047053506501.10	magenta	No
Tc00.1047053506501.184	magenta	Yes
Tc00.1047053506599.240	magenta	No
Tc00.1047053506599.310	magenta	No
Tc00.1047053506611.10	magenta	No
Tc00.1047053506667.120	magenta	No
Tc00.1047053506671.90	magenta	No
Tc00.1047053506759.40	magenta	No
Tc00.1047053506763.150	magenta	No
Tc00.1047053506763.234	magenta	Yes
Tc00.1047053506763.280	magenta	No
Tc00.1047053506767.340	magenta	No
Tc00.1047053506769.30	magenta	No
Tc00.1047053506781.19	magenta	No
Tc00.1047053506781.39	magenta	No
Tc00.1047053506785.14	magenta	No
Tc00.1047053506799.130	magenta	No
Tc00.1047053506799.50	magenta	No
Tc00.1047053506801.40	magenta	No
Tc00.1047053506813.29	magenta	No
Tc00.1047053506879.40	magenta	Yes
Tc00.1047053506939.180	magenta	No
Tc00.1047053506951.60	magenta	No
Tc00.1047053506965.130	magenta	No
Tc00.1047053506967.70	magenta	No
Tc00.1047053506971.60	magenta	No
Tc00.1047053507065.29	magenta	Yes
Tc00.1047053507069.94	magenta	No
Tc00.1047053507071.380	magenta	Yes
Tc00.1047053507085.70	magenta	Yes
Tc00.1047053507237.190	magenta	No
Tc00.1047053507237.250	magenta	Yes
Tc00.1047053507429.20	magenta	No
Tc00.1047053507429.40	magenta	Yes
Tc00.1047053507487.20	magenta	No
Tc00.1047053507699.37	magenta	Yes
Tc00.1047053507859.60	magenta	No
Tc00.1047053507937.20	magenta	Yes
Tc00.1047053507957.10	magenta	No
Tc00.1047053507957.220	magenta	No
Tc00.1047053508033.69	magenta	Yes
Tc00.1047053508147.90	magenta	Yes
Tc00.1047053508151.20	magenta	No
Tc00.1047053508157.20	magenta	No
Tc00.1047053508163.140	magenta	No
Tc00.1047053508163.320	magenta	No
Tc00.1047053508165.120	magenta	No
Tc00.1047053508165.150	magenta	No
Tc00.1047053508165.170	magenta	No
Tc00.1047053508221.104	magenta	No
Tc00.1047053508221.460	magenta	Yes
Tc00.1047053508221.920	magenta	Yes
Tc00.1047053508245.70	magenta	No
Tc00.1047053508253.10	magenta	No
Tc00.1047053508261.130	magenta	No
Tc00.1047053508261.50	magenta	No
Tc00.1047053508261.70	magenta	Yes
Tc00.1047053508289.70	magenta	Yes
Tc00.1047053508289.9	magenta	No
Tc00.1047053508293.140	magenta	No
Tc00.1047053508293.80	magenta	No
Tc00.1047053508389.130	magenta	No
Tc00.1047053508389.154	magenta	No
Tc00.1047053508389.50	magenta	No
Tc00.1047053508429.40	magenta	Yes
Tc00.1047053508433.180	magenta	No
Tc00.1047053508435.30	magenta	Yes
Tc00.1047053508435.40	magenta	Yes
Tc00.1047053508435.70	magenta	No
Tc00.1047053508493.110	magenta	No
Tc00.1047053508493.20	magenta	Yes
Tc00.1047053508495.210	magenta	Yes
Tc00.1047053508495.80	magenta	Yes
Tc00.1047053508499.30	magenta	Yes
Tc00.1047053508501.80	magenta	No
Tc00.1047053508633.30	magenta	Yes
Tc00.1047053508687.39	magenta	Yes
Tc00.1047053508939.30	magenta	No
Tc00.1047053508999.127	magenta	Yes
Tc00.1047053508999.70	magenta	No
Tc00.1047053509095.10	magenta	No
Tc00.1047053509195.70	magenta	No
Tc00.1047053509251.70	magenta	Yes
Tc00.1047053509493.100	magenta	Yes
Tc00.1047053509525.360	magenta	Yes
Tc00.1047053509545.79	magenta	No
Tc00.1047053509631.20	magenta	No
Tc00.1047053509657.50	magenta	No
Tc00.1047053509751.28	magenta	Yes
Tc00.1047053509753.210	magenta	No
Tc00.1047053509867.20	magenta	No
Tc00.1047053509867.60	magenta	No
Tc00.1047053509897.150	magenta	No
Tc00.1047053509897.210	magenta	Yes
Tc00.1047053509925.10	magenta	No
Tc00.1047053510013.150	magenta	Yes
Tc00.1047053510025.100	magenta	No
Tc00.1047053510025.160	magenta	No
Tc00.1047053510025.260	magenta	No
Tc00.1047053510047.100	magenta	Yes
Tc00.1047053510047.120	magenta	No
Tc00.1047053510105.310	magenta	No
Tc00.1047053510189.40	magenta	No
Tc00.1047053510197.220	magenta	Yes
Tc00.1047053510201.20	magenta	No
Tc00.1047053510213.39	magenta	No
Tc00.1047053510275.400	magenta	No
Tc00.1047053510279.190	magenta	No
Tc00.1047053510279.210	magenta	No
Tc00.1047053510279.310	magenta	No
Tc00.1047053510279.330	magenta	No
Tc00.1047053510361.260	magenta	No
Tc00.1047053510363.280	magenta	No
Tc00.1047053510377.350	magenta	No
Tc00.1047053510377.430	magenta	No
Tc00.1047053510387.40	magenta	No
Tc00.1047053510461.30	magenta	No
Tc00.1047053510463.120	magenta	No
Tc00.1047053510463.140	magenta	No
Tc00.1047053510463.90	magenta	No
Tc00.1047053510465.40	magenta	Yes
Tc00.1047053510469.10	magenta	No
Tc00.1047053510483.154	magenta	No
Tc00.1047053510483.310	magenta	No
Tc00.1047053510487.79	magenta	No
Tc00.1047053510495.20	magenta	No
Tc00.1047053510497.114	magenta	Yes
Tc00.1047053510547.14	magenta	Yes
Tc00.1047053510555.10	magenta	Yes
Tc00.1047053510561.50	magenta	No
Tc00.1047053510621.60	magenta	No
Tc00.1047053510623.50	magenta	Yes
Tc00.1047053510625.109	magenta	No
Tc00.1047053510625.19	magenta	No
Tc00.1047053510625.30	magenta	Yes
Tc00.1047053510625.54	magenta	No
Tc00.1047053510627.128	magenta	No
Tc00.1047053510627.150	magenta	No
Tc00.1047053510627.190	magenta	No
Tc00.1047053510627.60	magenta	No
Tc00.1047053510627.80	magenta	No
Tc00.1047053510629.10	magenta	No
Tc00.1047053510629.150	magenta	No
Tc00.1047053510629.240	magenta	Yes
Tc00.1047053510629.30	magenta	No
Tc00.1047053510629.310	magenta	No
Tc00.1047053510629.350	magenta	No
Tc00.1047053510629.70	magenta	No
Tc00.1047053510699.89	magenta	No
Tc00.1047053510715.64	magenta	No
Tc00.1047053510921.30	magenta	No
Tc00.1047053510933.90	magenta	No
Tc00.1047053511061.20	magenta	Yes
Tc00.1047053511063.110	magenta	Yes
Tc00.1047053511083.30	magenta	No
Tc00.1047053511089.10	magenta	No
Tc00.1047053511091.9	magenta	No
Tc00.1047053511173.180	magenta	No
Tc00.1047053511173.24	magenta	No
Tc00.1047053511173.309	magenta	Yes
Tc00.1047053511183.103	magenta	Yes
Tc00.1047053511183.200	magenta	Yes
Tc00.1047053511183.280	magenta	No
Tc00.1047053511183.420	magenta	Yes
Tc00.1047053511183.530	magenta	No
Tc00.1047053511255.280	magenta	No
Tc00.1047053511257.90	magenta	No
Tc00.1047053511259.180	magenta	No
Tc00.1047053511373.30	magenta	No
Tc00.1047053511449.80	magenta	Yes
Tc00.1047053511451.59	magenta	No
Tc00.1047053511451.90	magenta	No
Tc00.1047053511553.140	magenta	No
Tc00.1047053511603.100	magenta	No
Tc00.1047053511605.5	magenta	Yes
Tc00.1047053511607.110	magenta	No
Tc00.1047053511613.40	magenta	No
Tc00.1047053511613.60	magenta	No
Tc00.1047053511625.90	magenta	No
Tc00.1047053511643.130	magenta	Yes
Tc00.1047053511645.10	magenta	No
Tc00.1047053511787.10	magenta	No
Tc00.1047053511797.167	magenta	No
Tc00.1047053511797.200	magenta	No
Tc00.1047053511797.260	magenta	Yes
Tc00.1047053511839.20	magenta	No
Tc00.1047053511849.30	magenta	No
Tc00.1047053511861.100	magenta	Yes
Tc00.1047053511907.160	magenta	Yes
Tc00.1047053408825.5	orange	No
Tc00.1047053416605.30	orange	No
Tc00.1047053418405.10	orange	No
Tc00.1047053418613.20	orange	No
Tc00.1047053430603.10	orange	Yes
Tc00.1047053433237.20	orange	Yes
Tc00.1047053442801.5	orange	Yes
Tc00.1047053448661.10	orange	No
Tc00.1047053459793.20	orange	Yes
Tc00.1047053468217.14	orange	No
Tc00.1047053473313.10	orange	No
Tc00.1047053479481.10	orange	No
Tc00.1047053503491.39	orange	No
Tc00.1047053503501.7	orange	No
Tc00.1047053503633.11	orange	No
Tc00.1047053503659.10	orange	No
Tc00.1047053503973.240	orange	No
Tc00.1047053503973.50	orange	No
Tc00.1047053504015.11	orange	No
Tc00.1047053504197.5	orange	No
Tc00.1047053504737.20	orange	Yes
Tc00.1047053504975.10	orange	Yes
Tc00.1047053505025.40	orange	No
Tc00.1047053505949.169	orange	No
Tc00.1047053506131.5	orange	Yes
Tc00.1047053506139.1	orange	No
Tc00.1047053506269.99	orange	No
Tc00.1047053506277.30	orange	Yes
Tc00.1047053506329.79	orange	Yes
Tc00.1047053506329.9	orange	Yes
Tc00.1047053506361.9	orange	No
Tc00.1047053506409.130	orange	Yes
Tc00.1047053506499.105	orange	Yes
Tc00.1047053506737.107	orange	Yes
Tc00.1047053506759.220	orange	No
Tc00.1047053506761.11	orange	No
Tc00.1047053506767.5	orange	No
Tc00.1047053506901.85	orange	Yes
Tc00.1047053506939.220	orange	No
Tc00.1047053506969.3	orange	No
Tc00.1047053506971.80	orange	No
Tc00.1047053507041.55	orange	Yes
Tc00.1047053507075.40	orange	No
Tc00.1047053507085.150	orange	No
Tc00.1047053507173.30	orange	Yes
Tc00.1047053507579.10	orange	Yes
Tc00.1047053507605.13	orange	No
Tc00.1047053507633.21	orange	Yes
Tc00.1047053507701.4	orange	No
Tc00.1047053507729.50	orange	No
Tc00.1047053507745.10	orange	Yes
Tc00.1047053507905.39	orange	No
Tc00.1047053507987.30	orange	No
Tc00.1047053508125.14	orange	No
Tc00.1047053508163.10	orange	Yes
Tc00.1047053508167.29	orange	No
Tc00.1047053508221.820	orange	No
Tc00.1047053508251.50	orange	No
Tc00.1047053508261.15	orange	No
Tc00.1047053508291.10	orange	Yes
Tc00.1047053508293.27	orange	Yes
Tc00.1047053508311.31	orange	Yes
Tc00.1047053508313.140	orange	No
Tc00.1047053508365.4	orange	No
Tc00.1047053508433.233	orange	No
Tc00.1047053508451.5	orange	Yes
Tc00.1047053508481.20	orange	No
Tc00.1047053508493.50	orange	Yes
Tc00.1047053508499.20	orange	No
Tc00.1047053508509.11	orange	Yes
Tc00.1047053508629.120	orange	No
Tc00.1047053508745.70	orange	No
Tc00.1047053508747.59	orange	No
Tc00.1047053508761.174	orange	Yes
Tc00.1047053508873.510	orange	No
Tc00.1047053508875.20	orange	No
Tc00.1047053508883.10	orange	Yes
Tc00.1047053508979.15	orange	Yes
Tc00.1047053509227.20	orange	Yes
Tc00.1047053509275.20	orange	No
Tc00.1047053509419.140	orange	No
Tc00.1047053509525.432	orange	Yes
Tc00.1047053509947.20	orange	Yes
Tc00.1047053510019.30	orange	No
Tc00.1047053510023.30	orange	No
Tc00.1047053510209.27	orange	No
Tc00.1047053510213.9	orange	No
Tc00.1047053510359.570	orange	No
Tc00.1047053510359.690	orange	No
Tc00.1047053510391.50	orange	No
Tc00.1047053510417.40	orange	No
Tc00.1047053510463.259	orange	No
Tc00.1047053510475.120	orange	Yes
Tc00.1047053510475.51	orange	Yes
Tc00.1047053510483.230	orange	No
Tc00.1047053510557.73	orange	Yes
Tc00.1047053510705.20	orange	Yes
Tc00.1047053510791.30	orange	Yes
Tc00.1047053510791.60	orange	Yes
Tc00.1047053510809.20	orange	Yes
Tc00.1047053511063.11	orange	No
Tc00.1047053511079.100	orange	No
Tc00.1047053511083.39	orange	No
Tc00.1047053511095.5	orange	No
Tc00.1047053511099.140	orange	No
Tc00.1047053511147.10	orange	Yes
Tc00.1047053511173.496	orange	No
Tc00.1047053511255.580	orange	Yes
Tc00.1047053511403.40	orange	Yes
Tc00.1047053511547.10	orange	No
Tc00.1047053511547.14	orange	No
Tc00.1047053511553.200	orange	No
Tc00.1047053511611.50	orange	No
Tc00.1047053511851.61	orange	Yes
Tc00.1047053416605.10	red	No
Tc00.1047053503503.40	red	No
Tc00.1047053503533.40	red	No
Tc00.1047053503585.10	red	No
Tc00.1047053503587.80	red	Yes
Tc00.1047053503609.60	red	No
Tc00.1047053503645.10	red	No
Tc00.1047053503649.10	red	Yes
Tc00.1047053503665.30	red	No
Tc00.1047053503761.40	red	No
Tc00.1047053503849.40	red	No
Tc00.1047053503973.80	red	No
Tc00.1047053503977.30	red	No
Tc00.1047053504031.30	red	No
Tc00.1047053504035.41	red	Yes
Tc00.1047053504039.180	red	No
Tc00.1047053504039.230	red	No
Tc00.1047053504081.170	red	No
Tc00.1047053504081.350	red	No
Tc00.1047053504081.40	red	No
Tc00.1047053504081.420	red	No
Tc00.1047053504081.490	red	No
Tc00.1047053504155.160	red	No
Tc00.1047053504197.20	red	No
Tc00.1047053504239.110	red	No
Tc00.1047053504239.161	red	Yes
Tc00.1047053504239.220	red	No
Tc00.1047053504239.290	red	No
Tc00.1047053504239.350	red	No
Tc00.1047053504239.420	red	No
Tc00.1047053504261.40	red	No
Tc00.1047053504689.20	red	Yes
Tc00.1047053504769.20	red	No
Tc00.1047053504787.30	red	No
Tc00.1047053505025.130	red	No
Tc00.1047053505063.30	red	Yes
Tc00.1047053505621.10	red	Yes
Tc00.1047053505919.11	red	Yes
Tc00.1047053506067.240	red	No
Tc00.1047053506067.290	red	No
Tc00.1047053506067.34	red	Yes
Tc00.1047053506067.70	red	No
Tc00.1047053506131.190	red	No
Tc00.1047053506133.54	red	No
Tc00.1047053506133.61	red	No
Tc00.1047053506137.27	red	Yes
Tc00.1047053506139.110	red	No
Tc00.1047053506139.160	red	No
Tc00.1047053506139.70	red	No
Tc00.1047053506245.200	red	No
Tc00.1047053506267.39	red	Yes
Tc00.1047053506269.10	red	No
Tc00.1047053506269.40	red	No
Tc00.1047053506269.79	red	Yes
Tc00.1047053506279.160	red	Yes
Tc00.1047053506279.19	red	Yes
Tc00.1047053506279.74	red	Yes
Tc00.1047053506285.110	red	Yes
Tc00.1047053506285.40	red	Yes
Tc00.1047053506309.100	red	Yes
Tc00.1047053506309.140	red	No
Tc00.1047053506309.70	red	No
Tc00.1047053506321.50	red	No
Tc00.1047053506331.139	red	Yes
Tc00.1047053506335.100	red	No
Tc00.1047053506361.50	red	No
Tc00.1047053506409.190	red	Yes
Tc00.1047053506409.30	red	No
Tc00.1047053506451.80	red	Yes
Tc00.1047053506453.30	red	No
Tc00.1047053506459.10	red	No
Tc00.1047053506459.130	red	No
Tc00.1047053506459.149	red	No
Tc00.1047053506499.80	red	No
Tc00.1047053506501.110	red	No
Tc00.1047053506501.240	red	No
Tc00.1047053506501.290	red	No
Tc00.1047053506501.350	red	No
Tc00.1047053506501.50	red	Yes
Tc00.1047053506501.80	red	Yes
Tc00.1047053506589.140	red	No
Tc00.1047053506597.20	red	Yes
Tc00.1047053506599.150	red	No
Tc00.1047053506599.330	red	No
Tc00.1047053506599.420	red	No
Tc00.1047053506599.50	red	No
Tc00.1047053506611.40	red	No
Tc00.1047053506613.110	red	Yes
Tc00.1047053506613.20	red	Yes
Tc00.1047053506613.50	red	No
Tc00.1047053506615.29	red	Yes
Tc00.1047053506667.10	red	No
Tc00.1047053506667.40	red	No
Tc00.1047053506667.80	red	No
Tc00.1047053506671.10	red	No
Tc00.1047053506671.30	red	Yes
Tc00.1047053506703.140	red	No
Tc00.1047053506703.20	red	No
Tc00.1047053506737.121	red	Yes
Tc00.1047053506741.120	red	No
Tc00.1047053506741.140	red	No
Tc00.1047053506741.60	red	No
Tc00.1047053506741.90	red	No
Tc00.1047053506751.100	red	No
Tc00.1047053506751.20	red	Yes
Tc00.1047053506757.129	red	Yes
Tc00.1047053506757.150	red	No
Tc00.1047053506757.50	red	No
Tc00.1047053506761.40	red	Yes
Tc00.1047053506761.54	red	Yes
Tc00.1047053506763.260	red	No
Tc00.1047053506763.330	red	No
Tc00.1047053506763.50	red	No
Tc00.1047053506763.90	red	Yes
Tc00.1047053506765.46	red	Yes
Tc00.1047053506765.50	red	No
Tc00.1047053506765.74	red	No
Tc00.1047053506767.110	red	No
Tc00.1047053506767.140	red	No
Tc00.1047053506767.183	red	Yes
Tc00.1047053506767.230	red	No
Tc00.1047053506767.240	red	No
Tc00.1047053506767.40	red	No
Tc00.1047053506767.400	red	No
Tc00.1047053506767.70	red	No
Tc00.1047053506769.4	red	Yes
Tc00.1047053506769.60	red	Yes
Tc00.1047053506769.80	red	No
Tc00.1047053506813.211	red	Yes
Tc00.1047053506813.70	red	Yes
Tc00.1047053506877.20	red	No
Tc00.1047053506879.10	red	No
Tc00.1047053506909.90	red	Yes
Tc00.1047053506939.110	red	No
Tc00.1047053506955.150	red	No
Tc00.1047053506965.100	red	No
Tc00.1047053506965.180	red	No
Tc00.1047053506965.20	red	No
Tc00.1047053506965.70	red	No
Tc00.1047053506967.140	red	Yes
Tc00.1047053506967.50	red	No
Tc00.1047053506993.180	red	No
Tc00.1047053506993.86	red	Yes
Tc00.1047053506995.70	red	No
Tc00.1047053507063.340	red	No
Tc00.1047053507065.108	red	Yes
Tc00.1047053507065.127	red	Yes
Tc00.1047053507065.60	red	No
Tc00.1047053507069.50	red	Yes
Tc00.1047053507071.100	red	No
Tc00.1047053507071.20	red	No
Tc00.1047053507071.220	red	Yes
Tc00.1047053507071.240	red	No
Tc00.1047053507071.310	red	No
Tc00.1047053507071.349	red	No
Tc00.1047053507071.70	red	Yes
Tc00.1047053507145.70	red	Yes
Tc00.1047053507163.40	red	No
Tc00.1047053507185.26	red	Yes
Tc00.1047053507237.100	red	No
Tc00.1047053507237.170	red	No
Tc00.1047053507237.20	red	No
Tc00.1047053507237.270	red	No
Tc00.1047053507237.80	red	No
Tc00.1047053507295.20	red	No
Tc00.1047053507357.90	red	No
Tc00.1047053507523.60	red	No
Tc00.1047053507633.59	red	Yes
Tc00.1047053507637.150	red	Yes
Tc00.1047053507637.180	red	Yes
Tc00.1047053507679.60	red	Yes
Tc00.1047053507687.70	red	No
Tc00.1047053507747.170	red	No
Tc00.1047053507801.240	red	Yes
Tc00.1047053507867.10	red	No
Tc00.1047053507877.10	red	Yes
Tc00.1047053507949.219	red	Yes
Tc00.1047053507953.40	red	No
Tc00.1047053507955.20	red	No
Tc00.1047053507957.100	red	Yes
Tc00.1047053507957.160	red	No
Tc00.1047053507957.179	red	No
Tc00.1047053507957.200	red	No
Tc00.1047053507957.240	red	No
Tc00.1047053507957.280	red	No
Tc00.1047053507957.300	red	No
Tc00.1047053507957.60	red	Yes
Tc00.1047053507959.260	red	No
Tc00.1047053507959.280	red	No
Tc00.1047053507959.300	red	No
Tc00.1047053508011.110	red	No
Tc00.1047053508011.20	red	Yes
Tc00.1047053508047.20	red	No
Tc00.1047053508047.70	red	No
Tc00.1047053508081.30	red	No
Tc00.1047053508081.50	red	No
Tc00.1047053508081.70	red	No
Tc00.1047053508081.90	red	No
Tc00.1047053508099.9	red	Yes
Tc00.1047053508109.10	red	No
Tc00.1047053508109.30	red	No
Tc00.1047053508121.160	red	Yes
Tc00.1047053508121.90	red	Yes
Tc00.1047053508125.140	red	No
Tc00.1047053508159.50	red	Yes
Tc00.1047053508161.10	red	No
Tc00.1047053508161.30	red	No
Tc00.1047053508163.50	red	No
Tc00.1047053508165.110	red	No
Tc00.1047053508165.300	red	No
Tc00.1047053508165.350	red	No
Tc00.1047053508165.410	red	No
Tc00.1047053508165.420	red	No
Tc00.1047053508165.50	red	No
Tc00.1047053508167.10	red	Yes
Tc00.1047053508201.30	red	No
Tc00.1047053508219.70	red	No
Tc00.1047053508221.210	red	No
Tc00.1047053508221.320	red	Yes
Tc00.1047053508221.329	red	Yes
Tc00.1047053508221.360	red	Yes
Tc00.1047053508221.420	red	No
Tc00.1047053508221.509	red	Yes
Tc00.1047053508221.660	red	No
Tc00.1047053508221.810	red	Yes
Tc00.1047053508221.860	red	Yes
Tc00.1047053508221.894	red	No
Tc00.1047053508221.970	red	No
Tc00.1047053508227.20	red	No
Tc00.1047053508227.40	red	No
Tc00.1047053508229.30	red	No
Tc00.1047053508243.50	red	No
Tc00.1047053508245.40	red	No
Tc00.1047053508305.20	red	No
Tc00.1047053508313.114	red	Yes
Tc00.1047053508327.10	red	No
Tc00.1047053508359.80	red	No
Tc00.1047053508365.160	red	No
Tc00.1047053508433.10	red	No
Tc00.1047053508433.120	red	Yes
Tc00.1047053508433.220	red	No
Tc00.1047053508453.10	red	No
Tc00.1047053508509.51	red	Yes
Tc00.1047053508539.80	red	No
Tc00.1047053508541.130	red	No
Tc00.1047053508541.90	red	No
Tc00.1047053508613.74	red	No
Tc00.1047053508687.30	red	Yes
Tc00.1047053508745.20	red	No
Tc00.1047053508753.40	red	Yes
Tc00.1047053508759.10	red	No
Tc00.1047053508761.190	red	Yes
Tc00.1047053508761.70	red	No
Tc00.1047053508789.80	red	No
Tc00.1047053508869.59	red	No
Tc00.1047053508871.150	red	No
Tc00.1047053508871.40	red	No
Tc00.1047053508871.60	red	No
Tc00.1047053508873.10	red	No
Tc00.1047053508873.103	red	Yes
Tc00.1047053508873.280	red	Yes
Tc00.1047053508873.450	red	No
Tc00.1047053508873.460	red	No
Tc00.1047053508873.520	red	Yes
Tc00.1047053508985.10	red	Yes
Tc00.1047053509079.20	red	No
Tc00.1047053509195.50	red	No
Tc00.1047053509373.30	red	Yes
Tc00.1047053509419.120	red	Yes
Tc00.1047053509419.150	red	No
Tc00.1047053509419.190	red	Yes
Tc00.1047053509525.240	red	No
Tc00.1047053509545.50	red	No
Tc00.1047053509549.20	red	No
Tc00.1047053509657.30	red	No
Tc00.1047053509699.110	red	No
Tc00.1047053509699.140	red	Yes
Tc00.1047053509699.210	red	No
Tc00.1047053509753.140	red	No
Tc00.1047053509753.250	red	No
Tc00.1047053509753.310	red	No
Tc00.1047053509755.40	red	No
Tc00.1047053509755.80	red	Yes
Tc00.1047053509765.95	red	Yes
Tc00.1047053509971.44	red	Yes
Tc00.1047053509973.70	red	No
Tc00.1047053509975.30	red	No
Tc00.1047053509977.30	red	No
Tc00.1047053509979.174	red	No
Tc00.1047053509979.200	red	No
Tc00.1047053509979.270	red	No
Tc00.1047053509979.350	red	No
Tc00.1047053510013.170	red	No
Tc00.1047053510013.230	red	No
Tc00.1047053510013.290	red	No
Tc00.1047053510013.310	red	No
Tc00.1047053510013.70	red	No
Tc00.1047053510015.30	red	No
Tc00.1047053510017.30	red	Yes
Tc00.1047053510021.20	red	No
Tc00.1047053510021.210	red	Yes
Tc00.1047053510021.50	red	No
Tc00.1047053510025.220	red	No
Tc00.1047053510033.14	red	Yes
Tc00.1047053510047.60	red	Yes
Tc00.1047053510085.10	red	Yes
Tc00.1047053510089.10	red	No
Tc00.1047053510107.30	red	No
Tc00.1047053510139.10	red	Yes
Tc00.1047053510191.70	red	No
Tc00.1047053510197.160	red	Yes
Tc00.1047053510197.64	red	Yes
Tc00.1047053510213.70	red	No
Tc00.1047053510237.70	red	No
Tc00.1047053510239.70	red	No
Tc00.1047053510261.31	red	Yes
Tc00.1047053510269.20	red	No
Tc00.1047053510269.50	red	No
Tc00.1047053510275.190	red	No
Tc00.1047053510275.250	red	No
Tc00.1047053510275.306	red	Yes
Tc00.1047053510275.340	red	Yes
Tc00.1047053510275.370	red	No
Tc00.1047053510275.60	red	No
Tc00.1047053510279.120	red	No
Tc00.1047053510279.140	red	No
Tc00.1047053510279.250	red	No
Tc00.1047053510279.60	red	No
Tc00.1047053510307.19	red	Yes
Tc00.1047053510355.41	red	Yes
Tc00.1047053510359.380	red	No
Tc00.1047053510359.460	red	No
Tc00.1047053510359.520	red	No
Tc00.1047053510359.550	red	No
Tc00.1047053510359.600	red	No
Tc00.1047053510359.650	red	No
Tc00.1047053510361.110	red	No
Tc00.1047053510361.240	red	Yes
Tc00.1047053510363.220	red	No
Tc00.1047053510371.50	red	No
Tc00.1047053510373.10	red	No
Tc00.1047053510373.60	red	No
Tc00.1047053510373.90	red	No
Tc00.1047053510375.10	red	No
Tc00.1047053510377.100	red	No
Tc00.1047053510377.134	red	No
Tc00.1047053510377.200	red	No
Tc00.1047053510377.260	red	No
Tc00.1047053510377.30	red	Yes
Tc00.1047053510377.310	red	Yes
Tc00.1047053510377.450	red	No
Tc00.1047053510463.200	red	No
Tc00.1047053510483.120	red	No
Tc00.1047053510483.20	red	No
Tc00.1047053510483.220	red	No
Tc00.1047053510483.240	red	Yes
Tc00.1047053510483.70	red	No
Tc00.1047053510487.50	red	No
Tc00.1047053510489.36	red	Yes
Tc00.1047053510497.100	red	No
Tc00.1047053510497.50	red	No
Tc00.1047053510537.50	red	Yes
Tc00.1047053510553.30	red	No
Tc00.1047053510621.49	red	No
Tc00.1047053510629.290	red	Yes
Tc00.1047053510643.90	red	Yes
Tc00.1047053510693.163	red	No
Tc00.1047053510693.190	red	No
Tc00.1047053510693.230	red	No
Tc00.1047053510693.280	red	No
Tc00.1047053510697.60	red	No
Tc00.1047053510699.20	red	Yes
Tc00.1047053510701.40	red	Yes
Tc00.1047053510705.10	red	No
Tc00.1047053510709.60	red	No
Tc00.1047053510715.30	red	No
Tc00.1047053510915.10	red	No
Tc00.1047053510933.160	red	Yes
Tc00.1047053510933.20	red	No
Tc00.1047053511057.30	red	No
Tc00.1047053511077.110	red	No
Tc00.1047053511079.60	red	No
Tc00.1047053511081.10	red	No
Tc00.1047053511087.10	red	Yes
Tc00.1047053511095.20	red	Yes
Tc00.1047053511099.190	red	No
Tc00.1047053511099.84	red	Yes
Tc00.1047053511117.60	red	Yes
Tc00.1047053511149.190	red	Yes
Tc00.1047053511173.100	red	No
Tc00.1047053511183.260	red	No
Tc00.1047053511183.360	red	No
Tc00.1047053511183.560	red	No
Tc00.1047053511183.80	red	No
Tc00.1047053511221.50	red	No
Tc00.1047053511233.130	red	No
Tc00.1047053511255.30	red	No
Tc00.1047053511255.360	red	No
Tc00.1047053511255.50	red	No
Tc00.1047053511255.690	red	No
Tc00.1047053511259.70	red	Yes
Tc00.1047053511347.20	red	Yes
Tc00.1047053511451.30	red	Yes
Tc00.1047053511487.170	red	No
Tc00.1047053511553.10	red	No
Tc00.1047053511593.30	red	No
Tc00.1047053511593.60	red	No
Tc00.1047053511593.80	red	No
Tc00.1047053511595.30	red	No
Tc00.1047053511595.50	red	Yes
Tc00.1047053511597.40	red	No
Tc00.1047053511599.120	red	No
Tc00.1047053511603.160	red	No
Tc00.1047053511603.190	red	No
Tc00.1047053511603.30	red	No
Tc00.1047053511603.320	red	No
Tc00.1047053511603.80	red	No
Tc00.1047053511607.40	red	No
Tc00.1047053511609.30	red	No
Tc00.1047053511611.20	red	No
Tc00.1047053511625.140	red	Yes
Tc00.1047053511839.30	red	No
Tc00.1047053511843.10	red	No
Tc00.1047053511849.15	red	Yes
Tc00.1047053511853.21	red	Yes
Tc00.1047053511875.29	red	Yes
Tc00.1047053511875.9	red	No
